# Supplementary material for: Pdk3’s role in RANKL-induced osteoclast differentiation: insights from a bone marrow macrophage model
Source: PeerJ journal article supplement (doi:10.7717/peerj.18222), 2024-10-09
Supplement: Raw_data_for_Fig_1.zip [file Raw_data_for_Fig_1.zip]

## Sheet: Feuil1
Pdk3			Nfatc1			Trap			Ctsk			Oscar
PBS	RANKL		PBS	RANKL		PBS	RANKL		PBS	RANKL		PBS	RANKL
0	-5.25		0	-2.95		0	-2.84		0	-4.28		0	-0.96
0.13	-6.34		-0.09	-2.53		-0.09	-3.08		0.12	-4.48		0.17	-0.74
-0.14	-6.01		-0.05	-3.16		-0.11	-3.13		-0.13	-4.62		0.06	-1.19
results
Pdk3			Nfatc1			Trap			Ctsk			Oscar
PBS	RANKL		PBS	RANKL		PBS	RANKL		PBS	RANKL		PBS	RANKL
1	38.0546		1	7.72749		1	7.1602		1	19.4271		1	1.94531
0.913831	81.0084		1.06437	5.77572		1.06437	8.45614		0.920188	22.3159		0.888843	1.67018
1.10191	64.4452		1.03526	8.9383		1.07923	8.75435		1.09429	24.59		0.959264	2.28153

## Sheet: Regression analysis
Pdk3	Nfatc1		Pdk3	Trap		Pdk3	Ctsk		Pdk3	Oscar
1	1		1	1		1	1		1	1
0.913831	1.06437		0.913831	1.06437		0.913831	0.920188		0.913831	0.888843
1.10191	1.03526		1.10191	1.07923		1.10191	1.09429		1.10191	0.959264
38.0546	7.72749		38.0546	3.5801		38.0546	19.4271		38.0546	1.94531
81.0084	5.77572		81.0084	2.11404		81.0084	11.1579		81.0084	1.67018
64.4452	8.9383		64.4452	2.18859		64.4452	12.295		64.4452	2.28153
