# Supplementary material for: Pdk3’s role in RANKL-induced osteoclast differentiation: insights from a bone marrow macrophage model
Source: PeerJ journal article supplement (doi:10.7717/peerj.18222), 2024-10-09
Supplement: Raw_data_for_Fig_2.zip [file Raw_data_for_Fig_2.zip]

## Sheet: WB
P-ERK1/2			P-P65			P-JAK1			P-STAT1
PBS	RANKL		PBS	RANKL		PBS	RANKL		PBS	RANKL
0.197	0.811		0.212	0.743		0.131	0.616		0.132	0.986
0.167	0.631		0.098	0.527		0.156	0.503		0.089	0.705
0.212	0.929		0.142	0.632		0.199	0.739		0.087	0.685

## Sheet: Regression analysis
Pdk3	P-ERK1/2		Pdk3	P-P65		Pdk3	P-JAK1		Pdk3	P-STAT1
1	0.197		1	0.212		1	0.131		1	0.132
0.913831	0.167		0.913831	0.098		0.913831	0.156		0.913831	0.089
1.10191	0.212		1.10191	0.142		1.10191	0.199		1.10191	0.087
38.0546	0.811		38.0546	0.743		38.0546	0.616		38.0546	0.986
81.0084	0.631		81.0084	0.527		81.0084	0.503		81.0084	0.705
64.4452	0.929		64.4452	0.632		64.4452	0.739		64.4452	0.685
