# Supplementary material for: Pdk3’s role in RANKL-induced osteoclast differentiation: insights from a bone marrow macrophage model
Source: PeerJ journal article supplement (doi:10.7717/peerj.18222), 2024-10-09
Supplement: Raw_data_for_Fig_3.zip [file Raw_data_for_Fig_3.zip]

## Sheet: Feuil1
si-NC	si-Pdk3#1	si-Pdk3#2
0	5.35	0.58
-0.05	6.93	0.5
0.12	5.26	0.71
si-NC	si-Pdk3#1	si-Pdk3#2
1	0.0245183	0.668964
1.03526	0.00820091	0.707107
0.920188	0.0260965	0.61132
