# Supplementary material for: Pdk3’s role in RANKL-induced osteoclast differentiation: insights from a bone marrow macrophage model
Source: PeerJ journal article supplement (doi:10.7717/peerj.18222), 2024-10-09
Supplement: Raw_data_for_Fig_4.zip [file Raw_data_for_Fig_4.zip]

## Sheet: Feuil1
P-ERK1/2			P-P65			P-JAK1			P-STAT1
si-NC	si-Pdk3		si-NC	si-Pdk3		si-NC	si-Pdk3		si-NC	si-Pdk3
0.831818	0.114545		0.922727	0.245455		0.673636	0.183636		0.859091	0.128182
0.735455	0.235455		0.841818	0.347273		0.711818	0.113636		0.667273	0.109
0.955455	0.210909		1.00455	0.407273		0.787273	0.305455		0.733636	0.100909
