# Supplementary material for: Pdk3’s role in RANKL-induced osteoclast differentiation: insights from a bone marrow macrophage model
Source: PeerJ journal article supplement (doi:10.7717/peerj.18222), 2024-10-09
Supplement: Raw_data_for_Fig_5.zip [file Raw_data_for_Fig_5.zip]

## Sheet: Feuil1
Nfatc1			Trap			Ctsk			Oscar
si-NC	si-Pdk3		si-NC	si-Pdk3		si-NC	si-Pdk3		si-NC	si-Pdk3
0	2.56		0	1.82		0	4.02		0	2.87
0.17	2.42		0.07	2.35		-0.18	3.95		0.03	1.98
-0.12	3.23		0.13	1.43		-0.02	4.28		-0.14	2.22
Nfatc1			Trap			Ctsk			Oscar
si-NC	si-Pdk3		si-NC	si-Pdk3		si-NC	si-Pdk3		si-NC	si-Pdk3
1	0.169576		1	0.283221		1	0.0616395		1	0.136787
0.888843	0.186856		0.952638	0.196146		1.13288	0.0647041		0.97942	0.25349
1.08673	0.106579		0.913831	0.371131		1.01396	0.0514744		1.10191	0.214641
