# Supplementary material for: Pdk3’s role in RANKL-induced osteoclast differentiation: insights from a bone marrow macrophage model
Source: PeerJ journal article supplement (doi:10.7717/peerj.18222), 2024-10-09
Supplement: Raw_data_for_Fig_6.zip [file Raw_data_for_Fig_6.zip]

## Sheet: PCR of apoptosis  factor
Bax			Bcl2			Casp3
si-NC	si-Pdk3		si-NC	si-Pdk3		si-NC	si-Pdk3
0	-2.73		0	3.45		0	-1.34
-0.15	-2.31		-0.14	2.58		0.05	-1.32
-0.04	-2.1		0.24	2.59		-0.16	-1.26
Bax			Bcl2			Casp3
si-NC	si-Pdk3		si-NC	si-Pdk3		si-NC	si-Pdk3
1	6.63456		1	0.0915054		1	2.53151
1.10957	4.95883		1.10191	0.167241		0.965936	2.49666
1.02811	4.28709		0.846745	0.166086		1.11729	2.39496

## Sheet: PCR of Inflammatory factor
Il1b			Il6			Tnf
si-NC	si-Pdk3		si-NC	si-Pdk3		si-NC	si-Pdk3
0	2.41		0	0.77		0	5.52
-0.12	1.56		-0.07	1.02		-0.18	4.09
0.07	2.02		-0.09	1.11		-0.03	4.44
Il1b			Il6			Tnf
si-NC	si-Pdk3		si-NC	si-Pdk3		si-NC	si-Pdk3
1	0.188156		1	0.586417		1	0.0217929
1.08673	0.339151		1.04972	0.493116		1.13288	0.0587202
0.952638	0.246558		1.06437	0.463294		1.02101	0.0460709
