# Supplementary material for: Pdk3’s role in RANKL-induced osteoclast differentiation: insights from a bone marrow macrophage model
Source: PeerJ. 2024 Oct 9;12:e18222. doi: 10.7717/peerj.18222 (PMC11470767; doi:10.7717/peerj.18222)
Supplement: Supplemental Information 1 [file peerj-12-18222-s001.xls]

## Sheet: Sheet1
ITEM TO CHECK	IMPORTANCE	CHECKLIST
EXPERIMENTAL DESIGN
Definition of experimental and control groups	E	NA
Number within each group	E	page5line98-100
Assay carried out by core lab or investigator's lab?	D	NA
Acknowledgement of authors' contributions	D	NA
SAMPLE
Description	E	page5line92-97
Volume/mass of sample processed	D	NA
Microdissection or macrodissection	E	page5line92-97
Processing procedure	E	page5line92-97
If frozen - how and how quickly?	E	page5line92-97
If fixed - with what, how quickly?	E	page5line92-97
Sample storage conditions and duration (especially for FFPE samples)	E	page5line92-97
NUCLEIC ACID EXTRACTION
Procedure and/or instrumentation	E	page6-7line121-127
Name of kit and details of any modifications	E	page6-7line121-127
Source of additional reagents used	D	NA
Details of DNase or RNAse treatment	E	page6-7line121-127
Contamination assessment (DNA or RNA)	E	page6-7line121-127
Nucleic acid quantification	E	NA
Instrument and method	E	page6-7line121-127
Purity (A260/A280)	D	NA
Yield	D	NA
RNA integrity method/instrument	E	page6-7line121-127
RIN/RQI or Cq of 3' and 5' transcripts	E	page6-7line121-127
Electrophoresis traces	D	NA
Inhibition testing (Cq dilutions, spike or other)	E	page6-7line121-127
REVERSE TRANSCRIPTION
Complete reaction conditions	E	page6-7line121-127
Amount of RNA and reaction volume	E	page6-7line121-127
Priming oligonucleotide (if using GSP) and concentration	E	page6-7line121-127
Reverse transcriptase and concentration	E	page6-7line121-127
Temperature and time	E	page6-7line121-127
Manufacturer of reagents and catalogue numbers	D	NA
Cqs with and without RT	D*	NA
Storage conditions of cDNA	D	NA
qPCR TARGET INFORMATION
If multiplex, efficiency and LOD of each assay.	E	page6-7line121-127
Sequence accession number	E	page6-7line121-127
Location of amplicon	D	NA
Amplicon length	E	page6-7line121-127
In silico specificity screen (BLAST, etc)	E	page6-7line121-127
Pseudogenes, retropseudogenes or other homologs?	D	NA
Sequence alignment	D	NA
Secondary structure analysis of amplicon	D	NA
Location of each primer by exon or intron (if applicable)	E	page6-7line121-127
What splice variants are targeted?	E	page6-7line121-127
qPCR OLIGONUCLEOTIDES
Primer sequences	E	page6-7line121-127
RTPrimerDB Identification Number	D	NA
Probe sequences	D**	NA
Location and identity of any modifications	E	page6-7line121-127
Manufacturer of oligonucleotides	D	NA
Purification method	D	NA
qPCR PROTOCOL
Complete reaction conditions	E	page6-7line121-127
Reaction volume and amount of cDNA/DNA	E	page6-7line121-127
Primer, (probe), Mg++ and dNTP concentrations	E	page6-7line121-127
Polymerase identity and concentration	E	page6-7line121-127
Buffer/kit identity and manufacturer	E	page6-7line121-127
Exact chemical constitution of the buffer	D	NA
Additives (SYBR Green I, DMSO, etc.)	E	page6-7line121-127
Manufacturer of plates/tubes and catalog number	D	NA
Complete thermocycling parameters	E	page6-7line121-127
Reaction setup (manual/robotic)	D	NA
Manufacturer of qPCR instrument	E	page6-7line121-127
qPCR VALIDATION
Evidence of optimisation (from gradients)	D	NA
Specificity (gel, sequence, melt, or digest)	E	page6-7line121-127
For SYBR Green I, Cq of the NTC	E	page6-7line121-127
Standard curves with slope and y-intercept	E	page6-7line121-127
PCR efficiency calculated from slope	E	page6-7line121-127
Confidence interval for PCR efficiency or standard error	D	NA
r2 of standard curve	E	page6-7line121-127
Linear dynamic range	E	page6-7line121-127
Cq variation at lower limit	E	page6-7line121-127
Confidence intervals throughout range	D	NA
Evidence for limit of detection	E	page6-7line121-127
If multiplex, efficiency and LOD of each assay.	E	page6-7line121-127
DATA ANALYSIS
qPCR analysis program (source, version)	E	page6-7line121-127
Cq method determination	E	page6-7line121-127
Outlier identification and disposition	E	page6-7line121-127
Results of NTCs	E	page6-7line121-127
Justification of number and choice of reference genes	E	page6-7line121-127
Description of normalisation method	E	page6-7line121-127
Number and concordance of biological replicates	D	NA
Number and stage (RT or qPCR) of technical replicates	E	page6-7line121-127
Repeatability (intra-assay variation)	E	page6-7line121-127
Reproducibility (inter-assay variation, %CV)	D	NA
Power analysis	D	NA
Statistical methods for result significance	E	page6-7line121-127
Software (source, version)	E	page6-7line121-127
Cq or raw data submission using RDML	D	NA
Table 1. MIQE checklist for authors, reviewers and editors. All essential information (E) must be submitted with the manuscript. Desirable
information (D) should be submitted if available. If using primers obtained from RTPrimerDB, information on qPCR target, oligonucleotides,
protocols and validation is available from that source.
*: Assessing the absence of DNA using a no RT assay is essential when first extracting RNA. Once the sample has been validated as
RDNA-free, inclusion of a no-RT control is desirable, but no longer essential.
**: Disclosure of the probe sequence is highly desirable and strongly encouraged. However, since not all commercial pre-designed assay
vendors provide this information, it cannot be an essential requirement. Use of such assays is advised against.
