# Supplementary figures and images for: Pdk3’s role in RANKL-induced osteoclast differentiation: insights from a bone marrow macrophage model
Source: PeerJ journal article supplement (doi:10.7717/peerj.18222), 2024-10-09

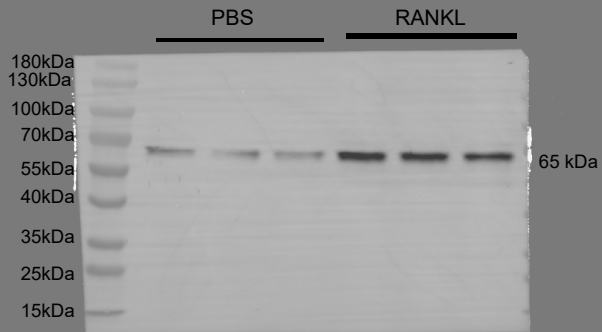

Supplement: wb_for_Fig2.zip [file wb_for_Fig2.zip]

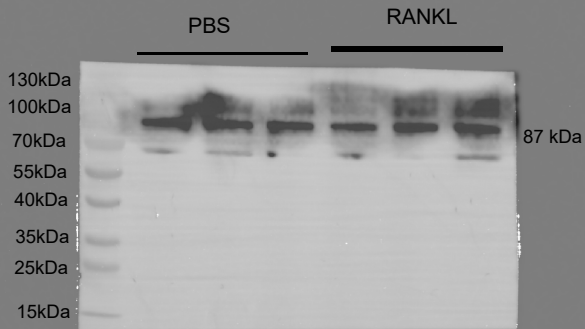

Supplement: wb_for_Fig2.zip [file wb_for_Fig2.zip]

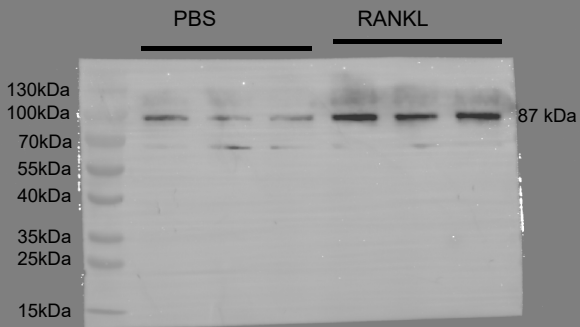

Supplement: wb_for_Fig2.zip [file wb_for_Fig2.zip]

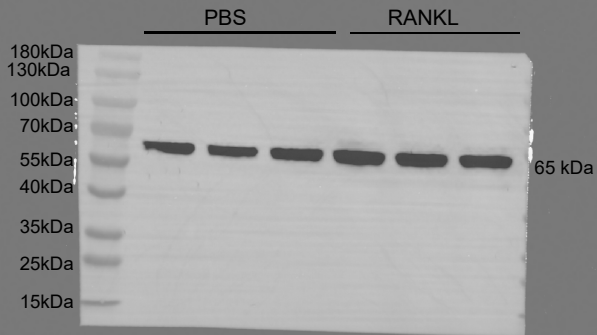

Supplement: wb_for_Fig2.zip [file wb_for_Fig2.zip]

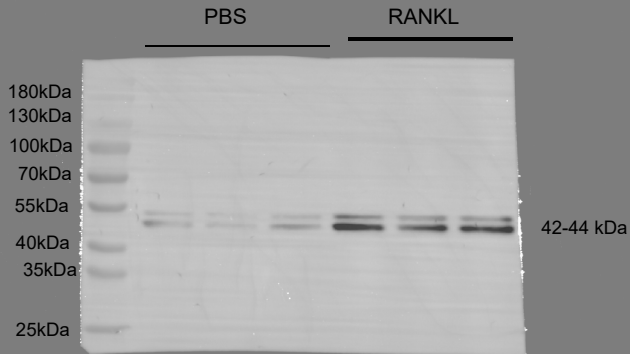

Supplement: wb_for_Fig2.zip [file wb_for_Fig2.zip]

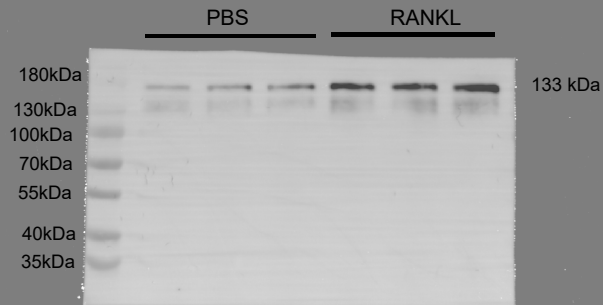

Supplement: wb_for_Fig2.zip [file wb_for_Fig2.zip]

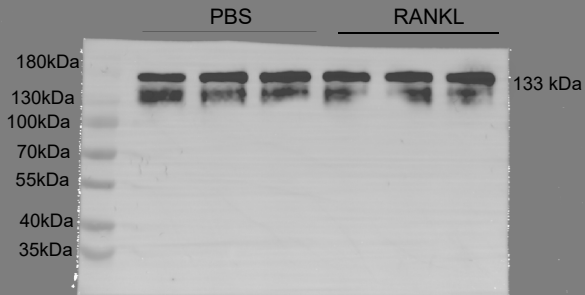

Supplement: wb_for_Fig2.zip [file wb_for_Fig2.zip]

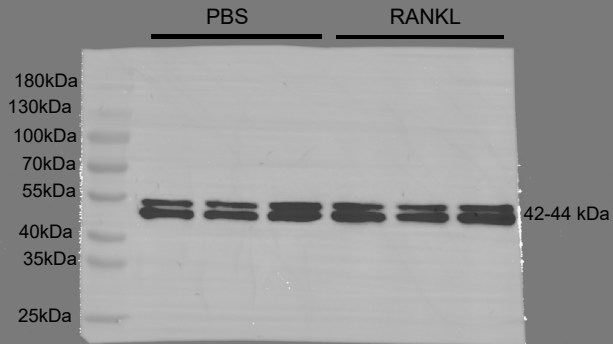

Supplement: wb_for_Fig2.zip [file wb_for_Fig2.zip]

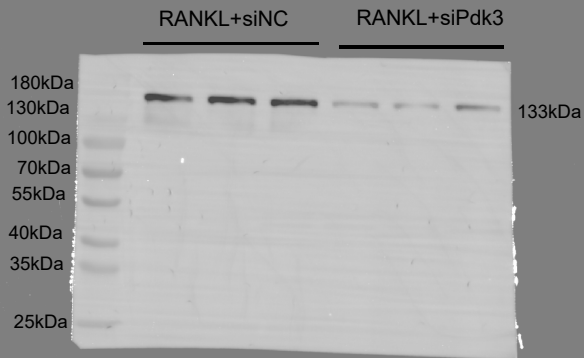

Supplement: wb_for_Fig4.zip [file wb_for_Fig4.zip]

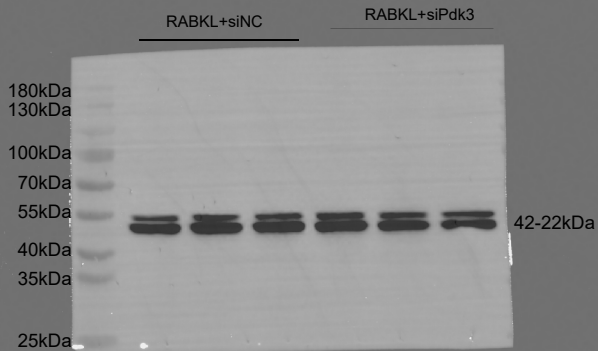

Supplement: wb_for_Fig4.zip [file wb_for_Fig4.zip]

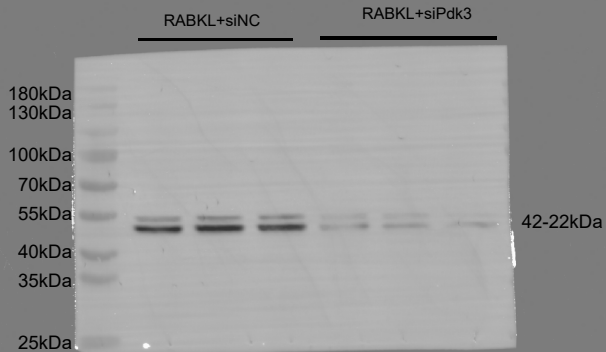

Supplement: wb_for_Fig4.zip [file wb_for_Fig4.zip]

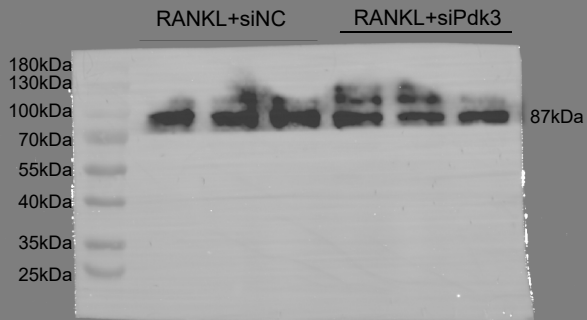

Supplement: wb_for_Fig4.zip [file wb_for_Fig4.zip]

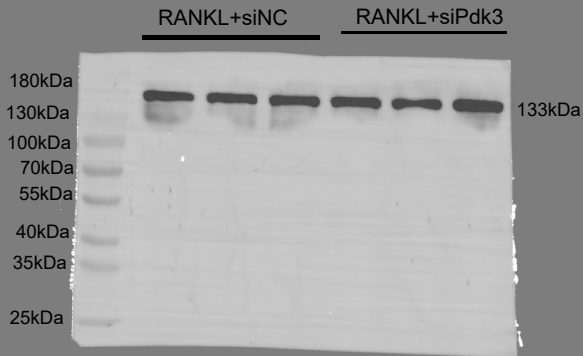

Supplement: wb_for_Fig4.zip [file wb_for_Fig4.zip]

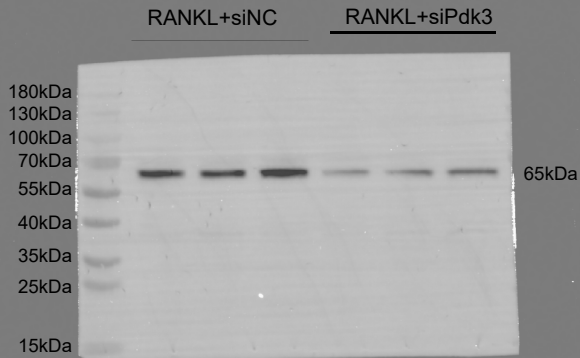

Supplement: wb_for_Fig4.zip [file wb_for_Fig4.zip]

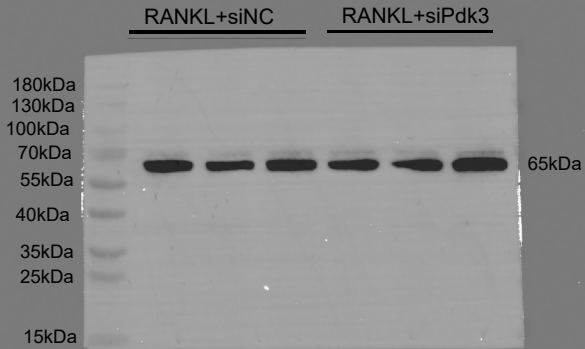

Supplement: wb_for_Fig4.zip [file wb_for_Fig4.zip]

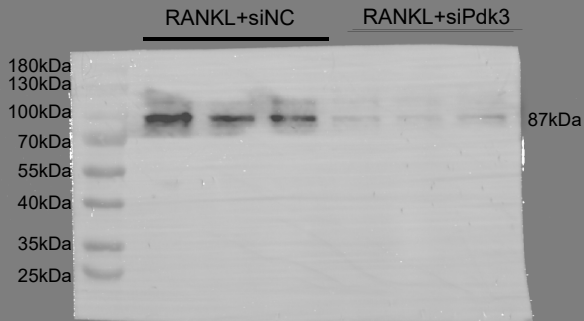

Supplement: wb_for_Fig4.zip [file wb_for_Fig4.zip]
